# Supplementary material for: Modulation of the Selectivity in Anions Recognition Processes by Combining Hydrogen- and Halogen-Bonding Interactions
Source: MDPI journal article supplement (doi:10.3390/molecules22122273), 2017-12-20
Supplement: s1 [file s1]

## Supporting Information (SI)

# Modulation of the selectivity in anions recognition processes by complexing hydrogen- and halogen- bonding interactions

Fabiola Zapata, Sergio J. Benítez-Benítez, Paula Sabater, Antonio Caballero,\* and  
Pedro Molina \*

*Departamento de Química Orgánica. Facultad de Química. Universidad de Murcia.  
Campus de Espinardo, E-30100 Murcia, Spain.*

*E-mail:* [pmolina@um.es](mailto:pmolina@um.es); [antocaba@um.es](mailto:antocaba@um.es)

### Table of contents

|                                                                                                                                                                                              |    |
|----------------------------------------------------------------------------------------------------------------------------------------------------------------------------------------------|----|
| <sup>1</sup> H- and <sup>13</sup> C-NMR spectra of compounds <b>2-5</b>                                                                                                                      | S3 |
| <b>Figure S1.</b> Changes in the fluorescence emission of <b>5<sup>2+</sup>·2PF<sub>6</sub><sup>-</sup></b> in CH <sub>3</sub> CN upon addition of F <sup>-</sup> anions from 0 to 1.8 equiv | S8 |
| <b>Figure S2.</b> Changes in the fluorescence emission of <b>5<sup>2+</sup>·2PF<sub>6</sub><sup>-</sup></b> in CH <sub>3</sub> CN upon addition of F <sup>-</sup> anions from 1.8 to 5 equiv | S8 |
| <b>Figure S3.</b> Changes in the fluorescence emission of <b>5<sup>2+</sup>·2PF<sub>6</sub><sup>-</sup></b> in CH <sub>3</sub> CN upon addition of AcO <sup>-</sup> anion.                   | S9 |
| <b>Figure S4.</b> Semilogarithmic plot for determining the detection limit of <b>5<sup>2+</sup>·2PF<sub>6</sub><sup>-</sup></b> towards H <sub>2</sub> PO <sub>4</sub> <sup>-</sup> .        | S9 |

|                                                                                                                                                              |     |
|--------------------------------------------------------------------------------------------------------------------------------------------------------------|-----|
| <b>Figure S5.</b> Semilogarithmic plot for determining the detection limit of $5^{2+} \cdot 2PF_6^-$ towards $AcO^-$ .                                       | S10 |
| <b>Figure S6.</b> Semilogarithmic plot for determining the detection limit of $5^{2+} \cdot 2PF_6^-$ towards $SO_4^{2-}$ .                                   | S10 |
| <b>Figure S7.</b> Job's plot for $5^{2+} \cdot 2PF_6^-$ and $H_2PO_4^{2-}$                                                                                   | S11 |
| <b>Figure S8.</b> Job's plot for $5^{2+} \cdot 2PF_6^-$ and $SO_4^{2-}$                                                                                      | S11 |
| <b>Figure S9.</b> Job's plot for $5^{2+} \cdot 2PF_6^-$ and $AcO^-$                                                                                          | S12 |
| <b>Figure S10.</b> $^1H$ NMR spectral changes of the receptor $5^{2+} \cdot 2PF_6^-$ during the addition of $SO_4^{2-}$ anion.                               | S12 |
| <b>Figure S11.</b> $^1H$ NMR spectral changes of the receptor $5^{2+} \cdot 2PF_6^-$ during the addition of $HP_2O_7^{3-}$ anion.                            | S13 |
| <b>Figure S12.</b> $^1H$ NMR spectral changes of the receptor $5^{2+} \cdot 2PF_6^-$ during the addition of $F^-$ anion.                                     | S14 |
| <b>Figure S13.</b> $^1H$ NMR spectral changes observed in the methyl protons of the receptor $5^{2+} \cdot 2PF_6^-$ during the addition of $H_2PO_4^-$ ions. | S14 |
| <b>Figure S14.</b> Titration profile of the receptor $5^{2+} \cdot 2PF_6^-$ and $H_2PO_4^-$ from the $^1H$ -NMR experiments                                  | S15 |
| <b>Figure S15.</b> Titration profile of the receptor $5^{2+} \cdot 2PF_6^-$ and $SO_4^{2-}$ from the $^1H$ -NMR experiments                                  | S15 |
| <b>Figure S16.</b> Mass spectrum of the imidazolone $6^+ \cdot PF_6^-$                                                                                       | S16 |

## Compound 2

$^1\text{H}$ -NMR ( $\text{CDCl}_3$ , 400 MHz)

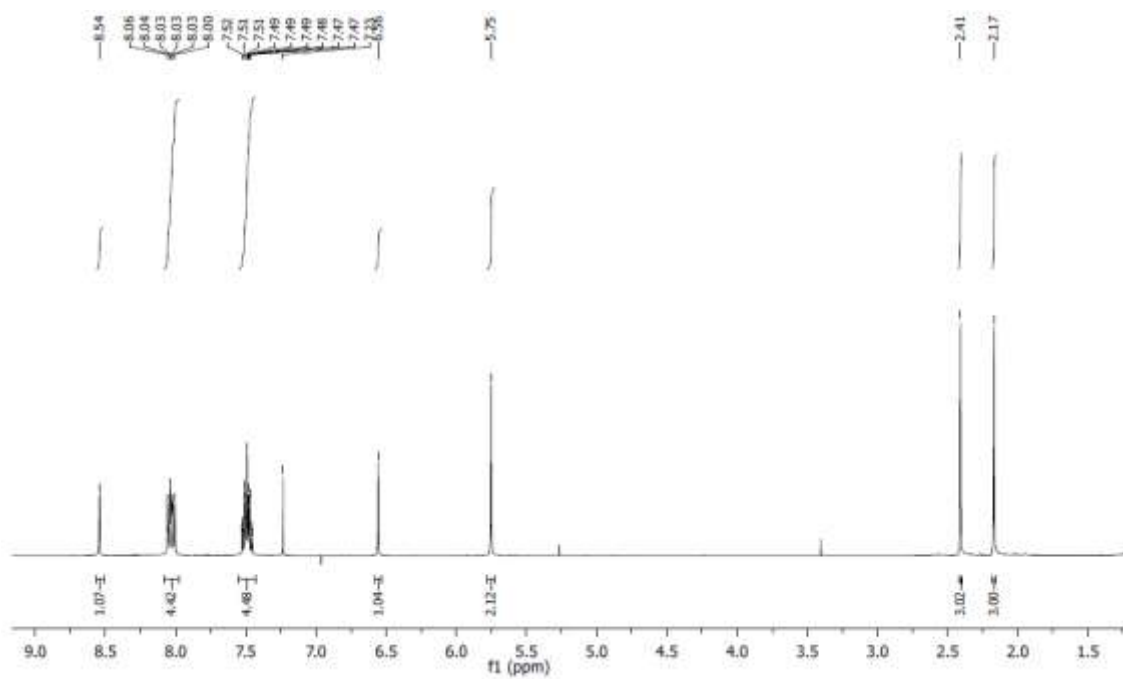

$^{13}\text{C}$  NMR (100 MHz,  $\text{CDCl}_3$ )

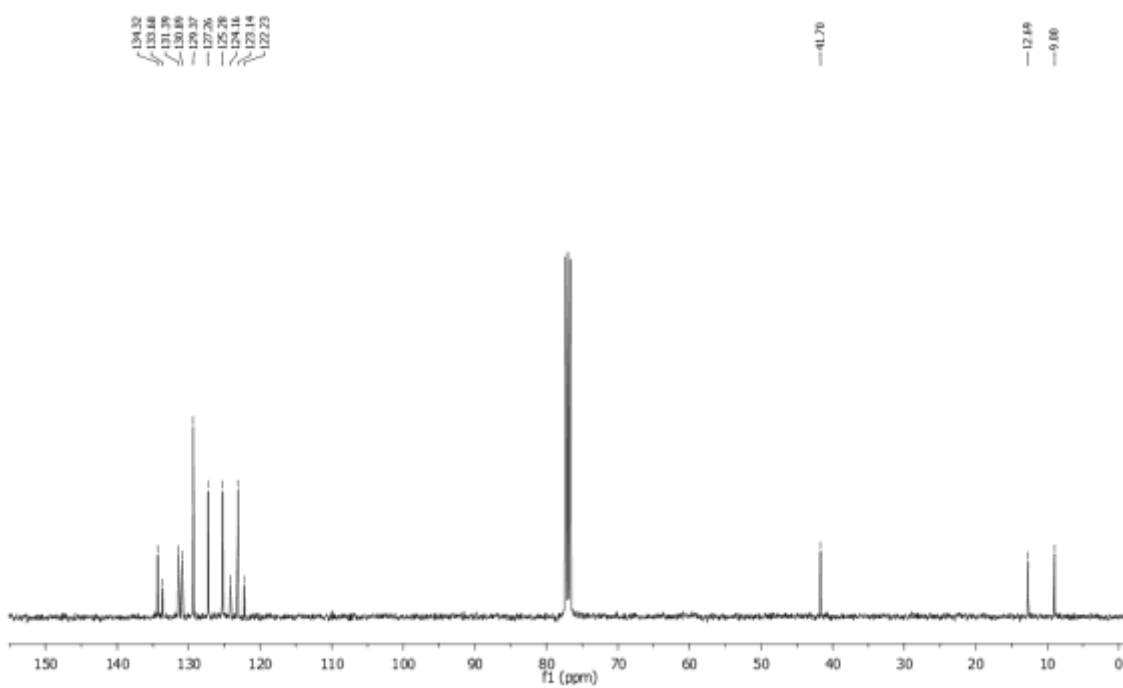

**Compound 3<sup>+</sup>·Br<sup>-</sup>**

**<sup>1</sup>H-NMR (CDCl<sub>3</sub>, 400 MHz)**

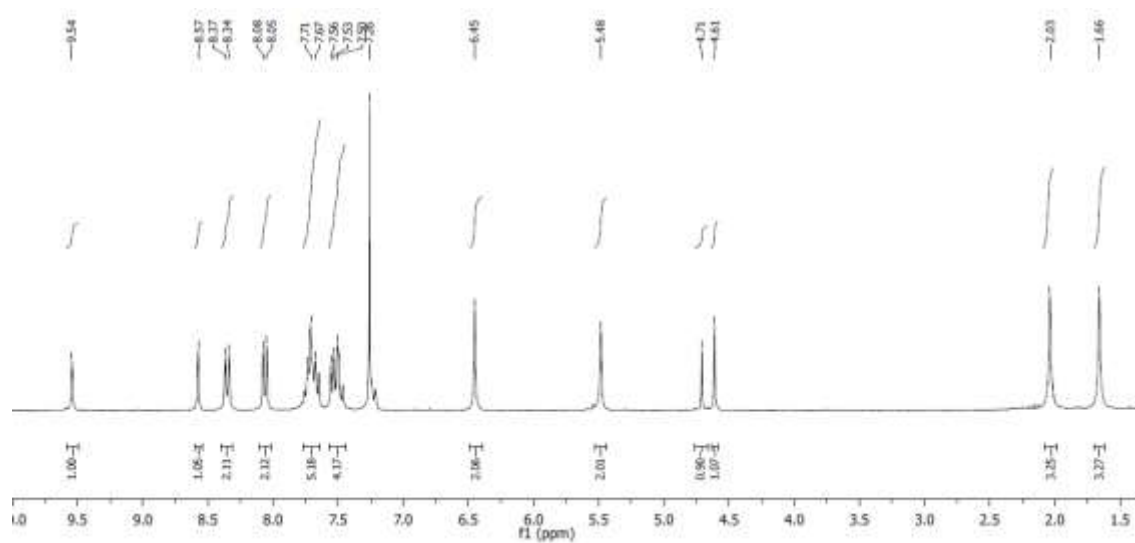

**<sup>13</sup>C-NMR (CDCl<sub>3</sub>, 75 MHz)**

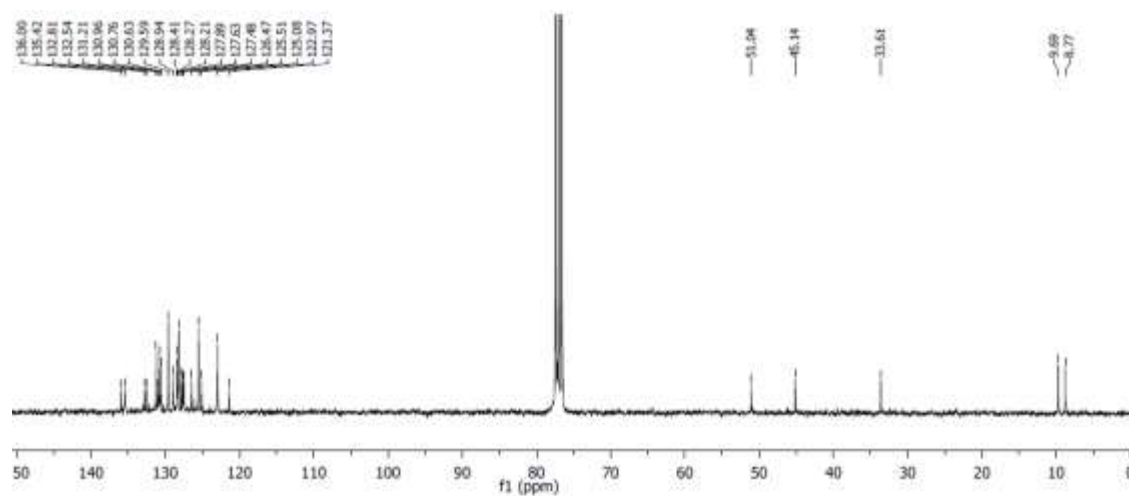

## Compound 4

$^1\text{H}$ -NMR ( $\text{CDCl}_3$ , 400 MHz)

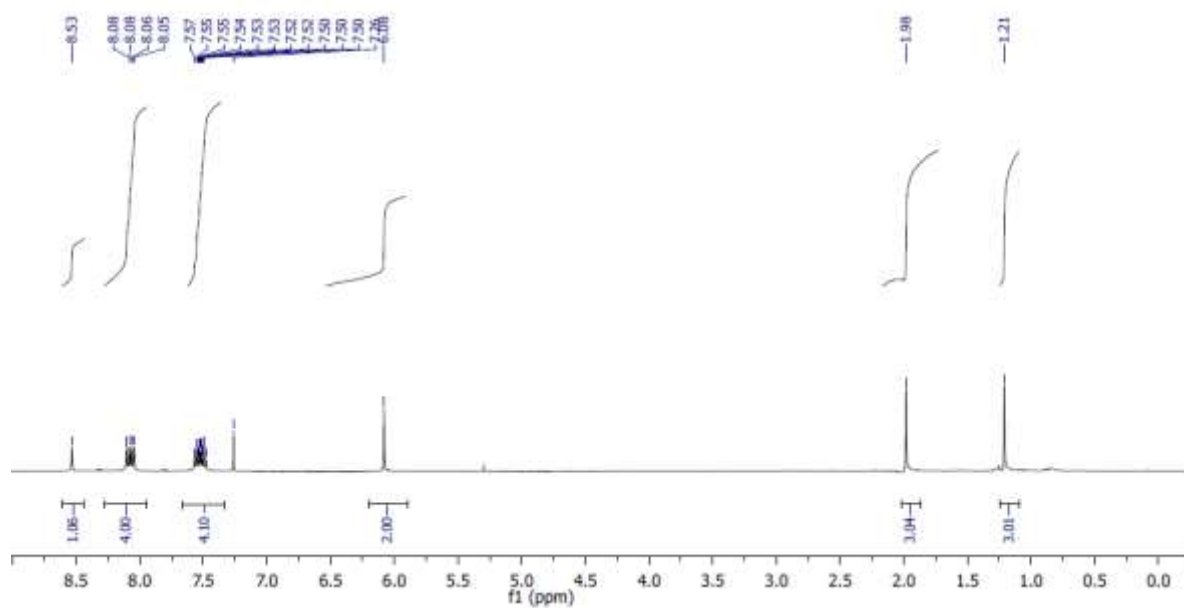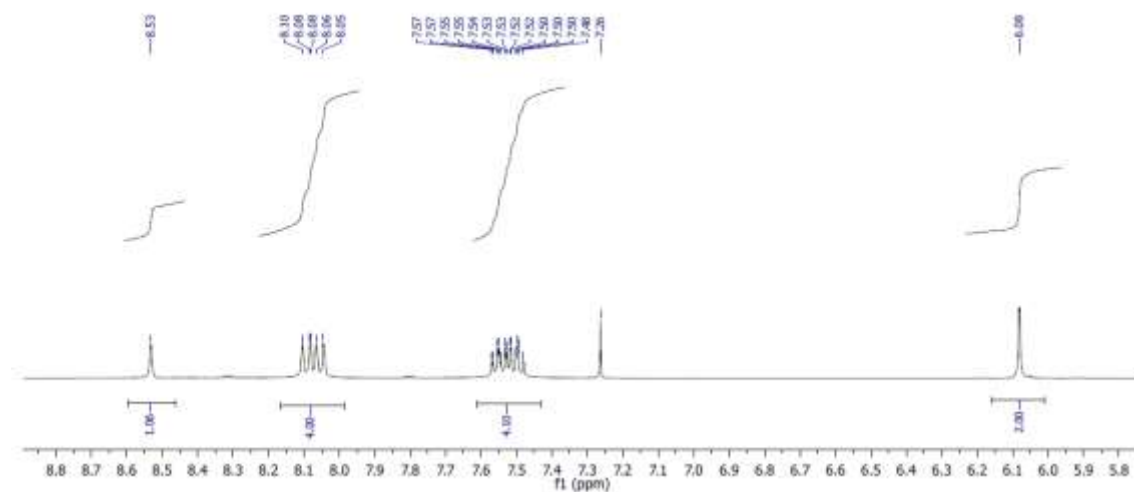

$^{13}\text{C}$ -NMR ( $\text{CDCl}_3$ , 100 MHz)

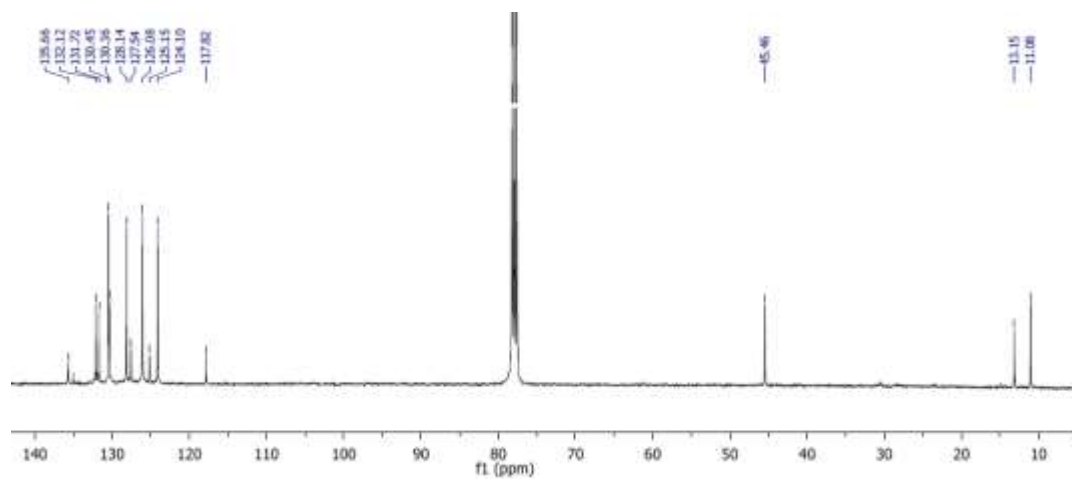

Compound  $5^{2+} \cdot 2Br^-$

$^1H$ -NMR (DMSO, 400 MHz)

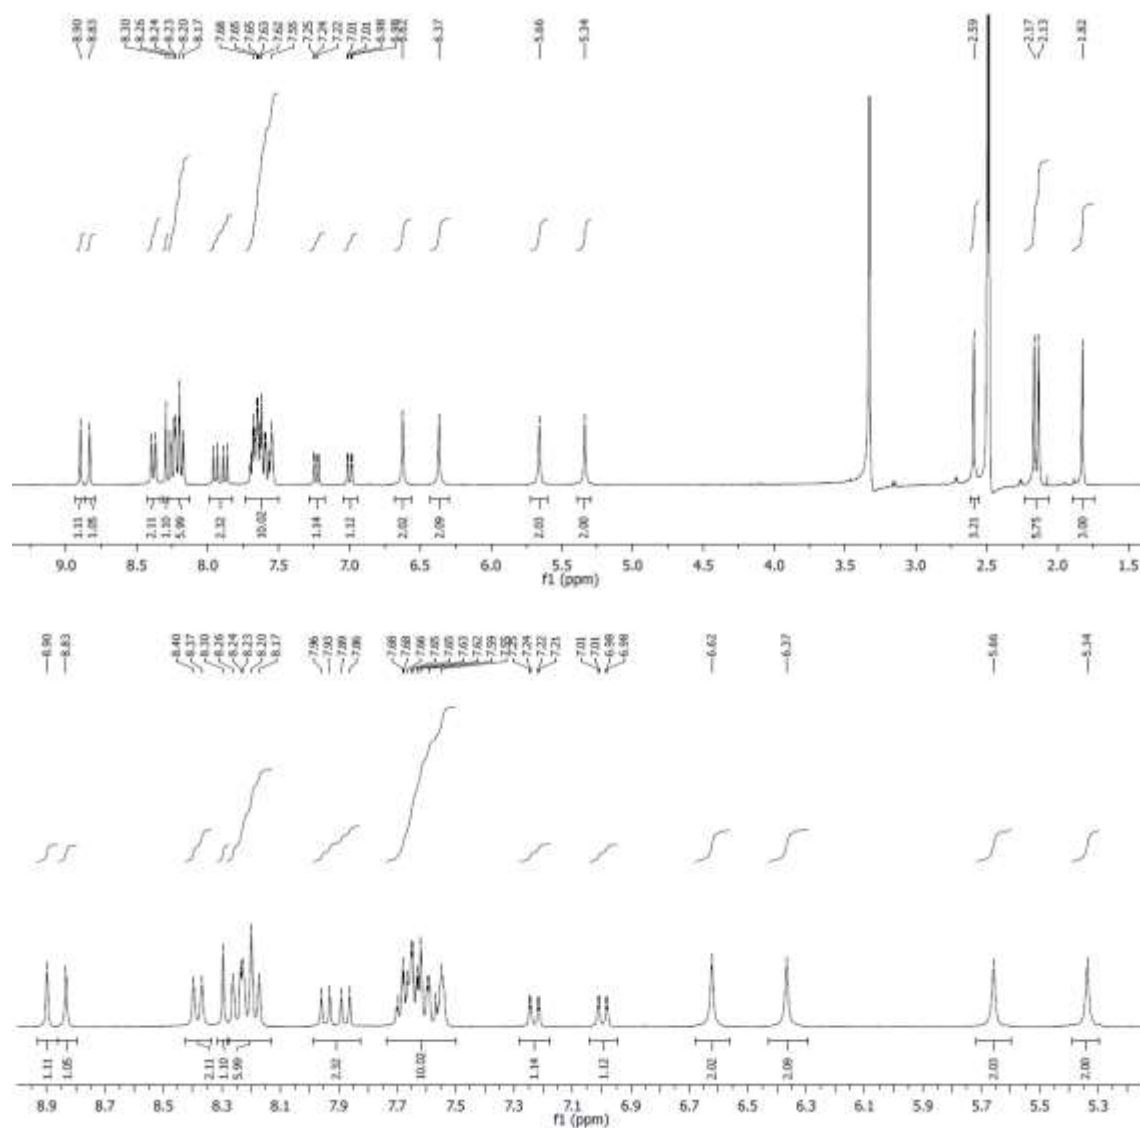

$^{13}C$ -NMR (DMSO, 75 MHz)

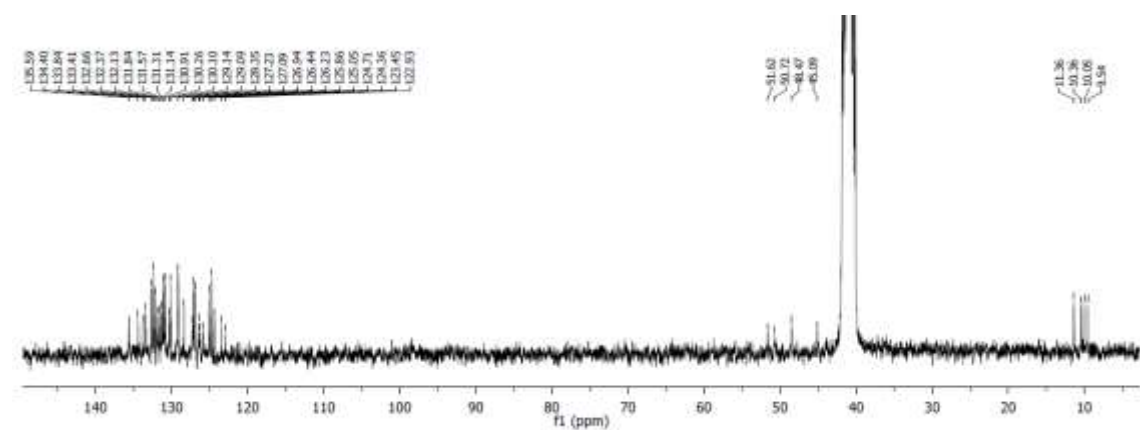

**Compound  $5^{2+} \cdot 2PF_6^-$**

**$^1H$ -NMR (DMSO, 400 MHz)**

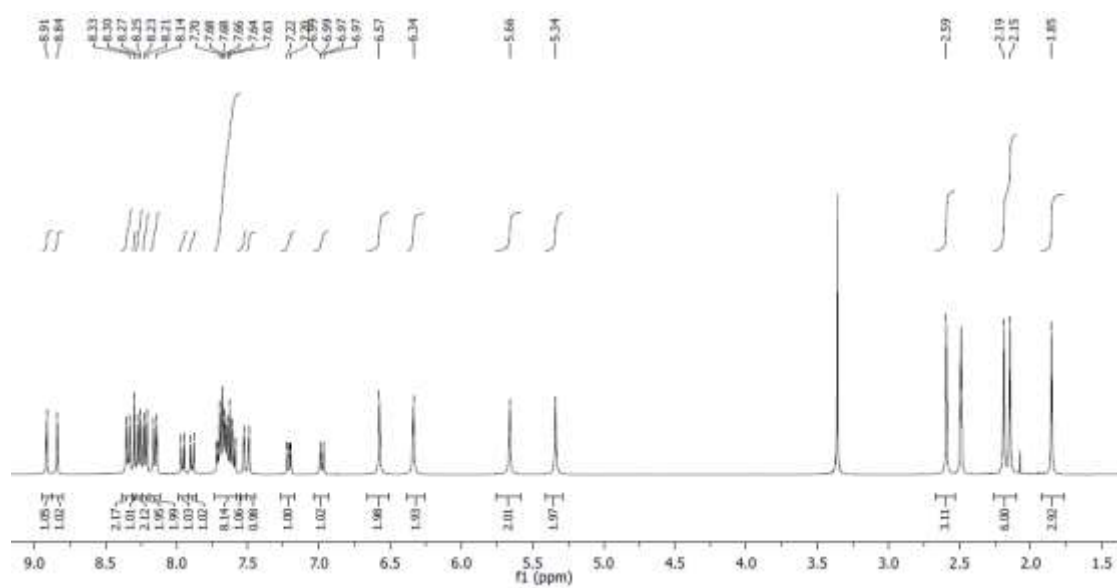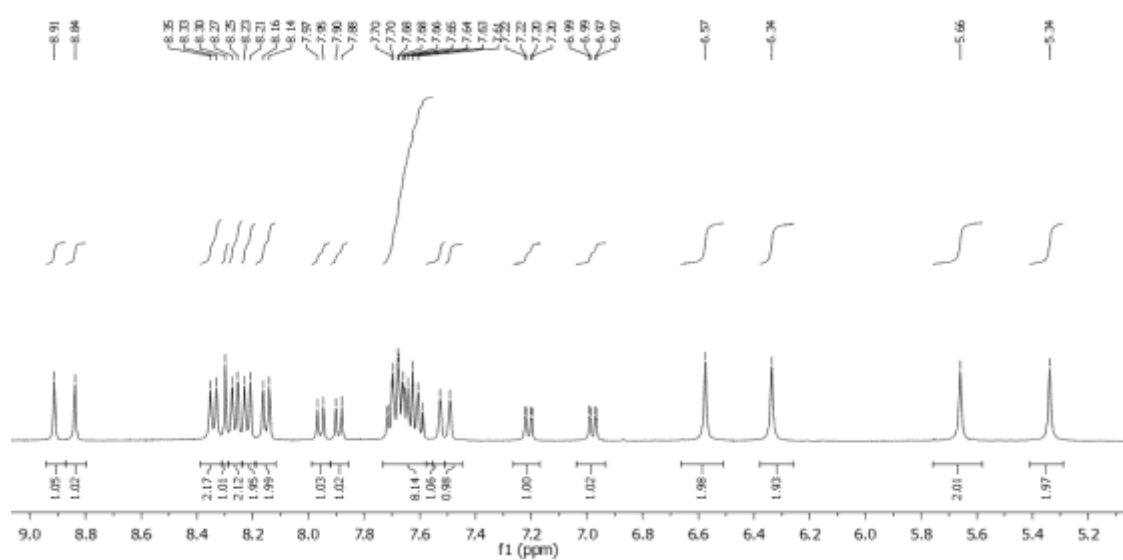

**$^{13}C$ -NMR (DMSO, 100 MHz)**

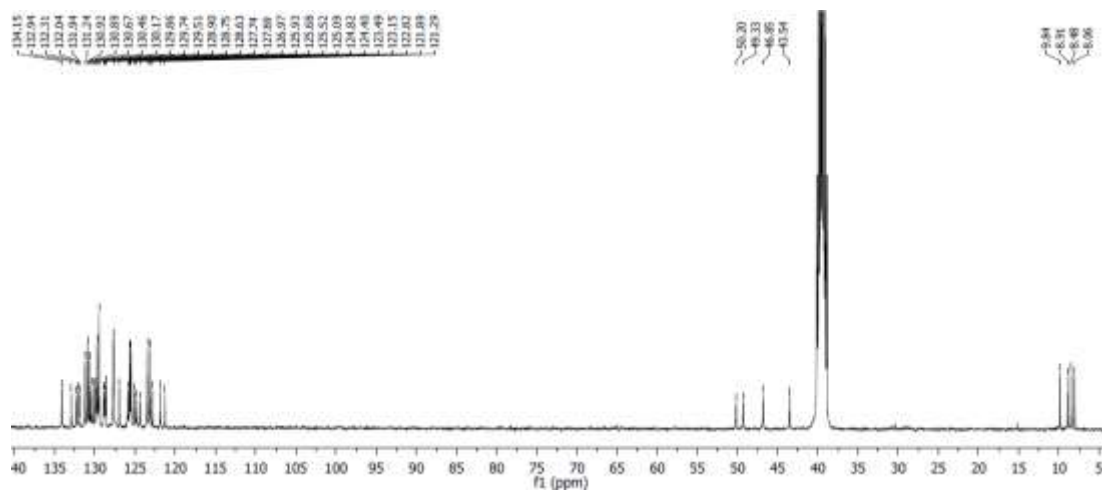

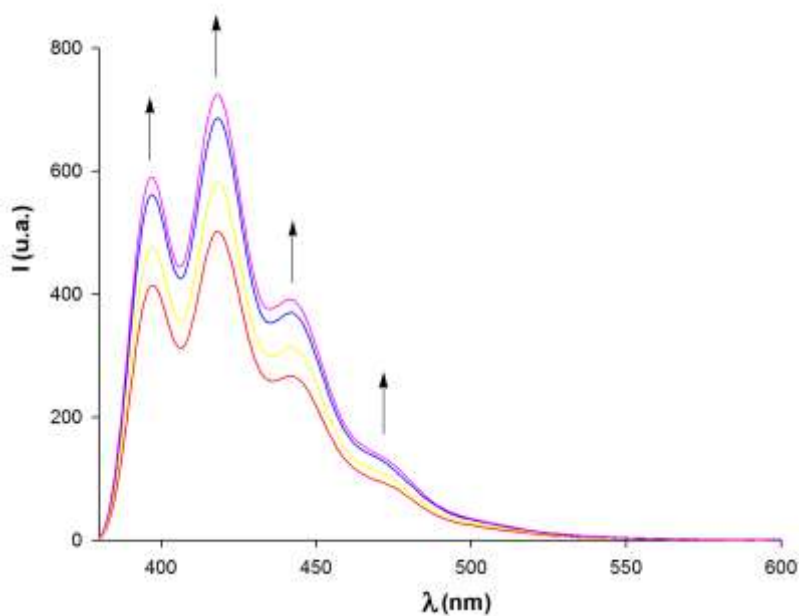

**Figure S1.** Changes in the fluorescence spectra of receptor  $5^{2+} \cdot 2PF_6^{-}$  ( $c = 1 \cdot 10^{-5}$  M in  $CH_3CN$ ) upon addition of  $F^{-}$  anions from 0 to 1.8 equiv at 20 °C.

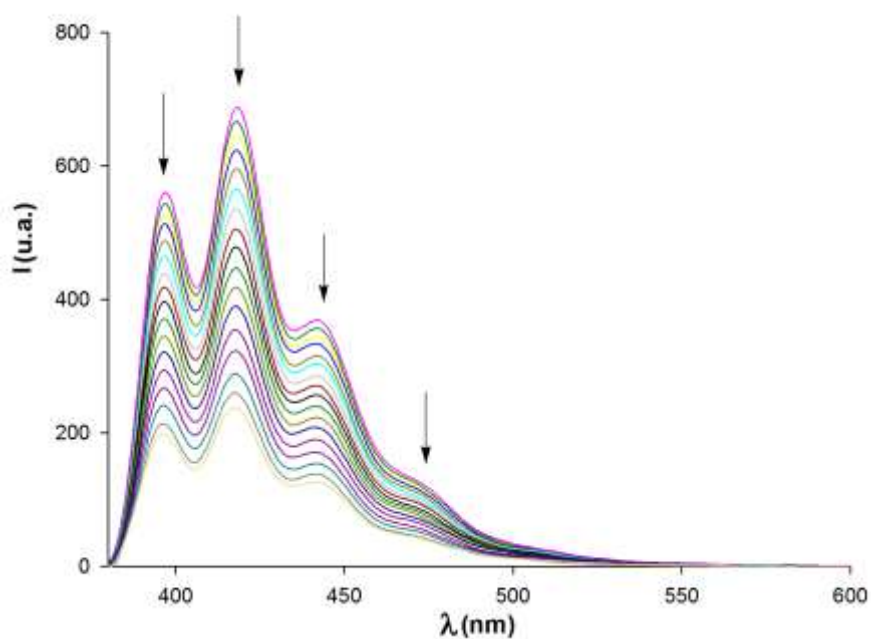

**Figure S2.** Changes in the fluorescence spectra of receptor  $5^{2+} \cdot 2PF_6^{-}$  ( $c = 1 \cdot 10^{-6}$  M in  $CH_3CN$ ) upon addition of  $F^{-}$  anions from 1.8 to 5 equiv at 20 °C.

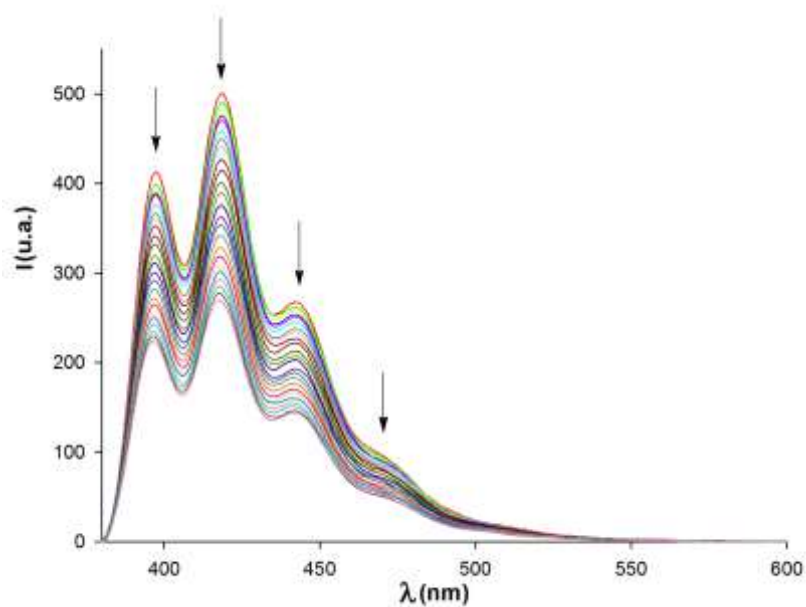

**Figure S3.** Changes in the fluorescence spectra of receptor  $5^{2+} \cdot 2PF_6^{-}$  ( $c = 1 \cdot 10^{-6}$  M in  $CH_3CN$ ) upon addition of  $AcO^{-}$  anions at 20 °C.

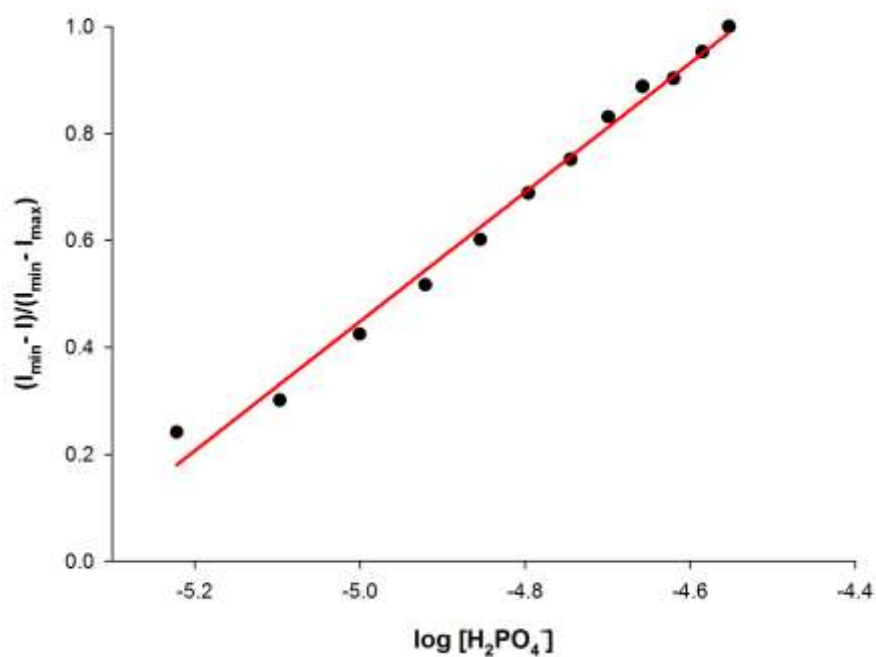

**Figure S4.** Fluorescence intensity of  $5^{2+} \cdot 2PF_6^{-}$  (in  $CH_3CN$ ) at each concentration of  $H_2PO_4^{-}$  added, normalized between the minimum fluorescence intensity, found at zero equiv of  $H_2PO_4^{-}$ ; and the maximum fluorescence intensity. The detection limit was found at  $[H_2PO_4^{-}] = 3.90 \times 10^{-6}$  M.

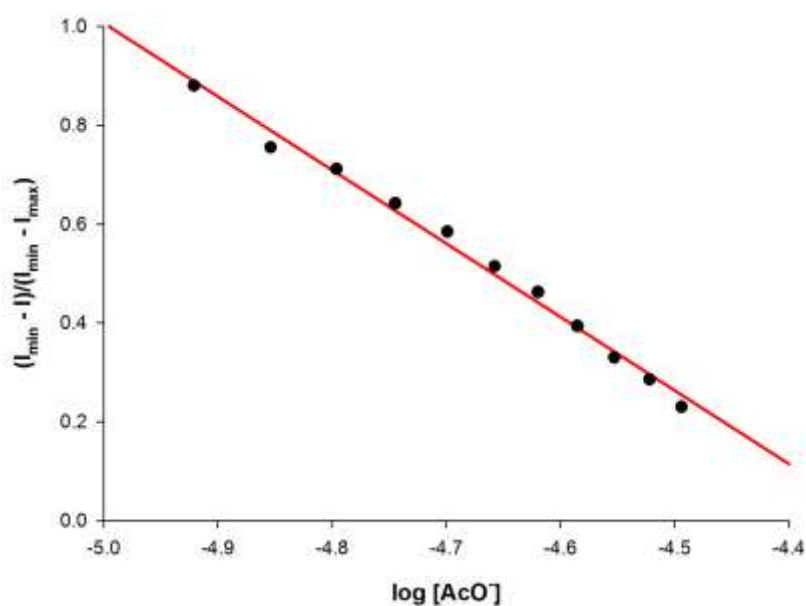

**Figure S5.** Fluorescence intensity of  $5^{2+} \cdot 2PF_6^-$  (in  $CH_3CN$ ) at each concentration of  $AcO^-$  added, normalized between the minimum fluorescence intensity, found at zero equiv of  $AcO^-$ ; and the maximum fluorescence intensity. The detection limit was found at  $[AcO^-] = 4.59 \times 10^{-5} M$ .

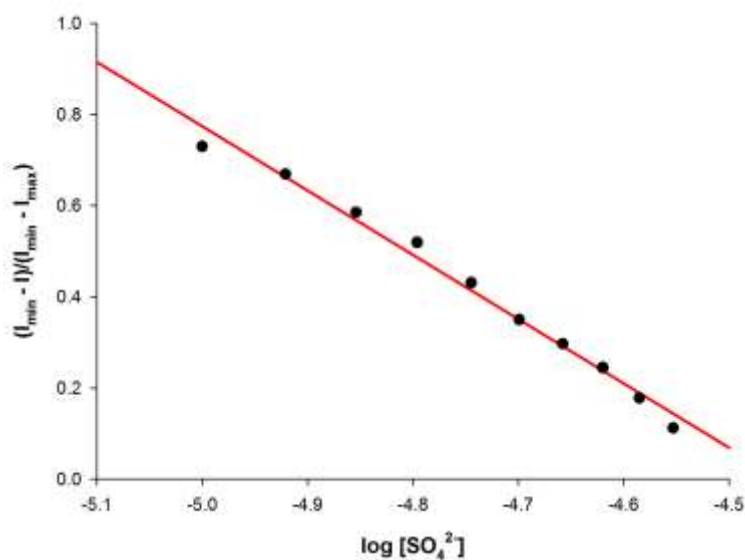

**Figure S6.** Fluorescence intensity of  $5^{2+} \cdot 2PF_6^-$  (in  $CH_3CN$ ) at each concentration of  $SO_4^{2-}$  added, normalized between the minimum fluorescence intensity, found at zero equiv of  $Pb^{2+}$ ; and the maximum fluorescence intensity. The detection limit was found at  $[SO_4^{2-}] = 3.57 \times 10^{-5} M$ .

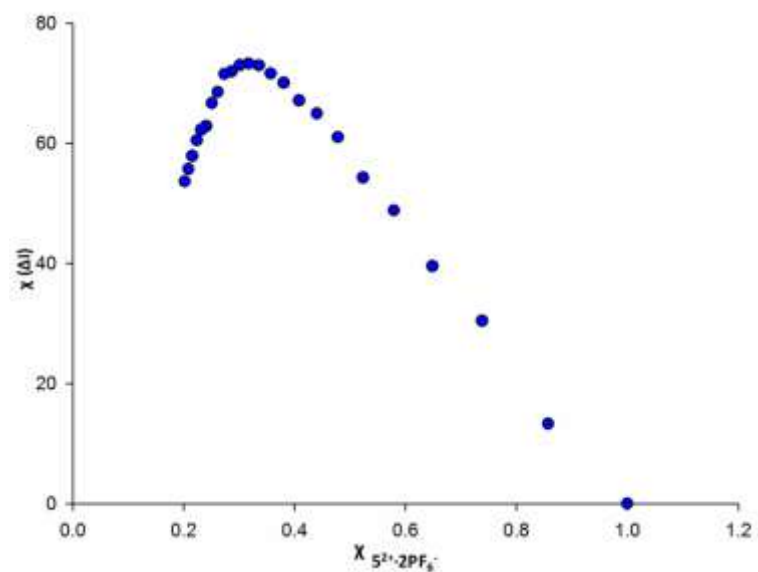

**Figure S7.** Job plot experiment, using the emission titration data, with a maximum at 0.33 indicating 1:2 stoichiometry for receptor  $5^{2+} \cdot 2PF_6^-$  and  $H_2PO_4^-$  anions.

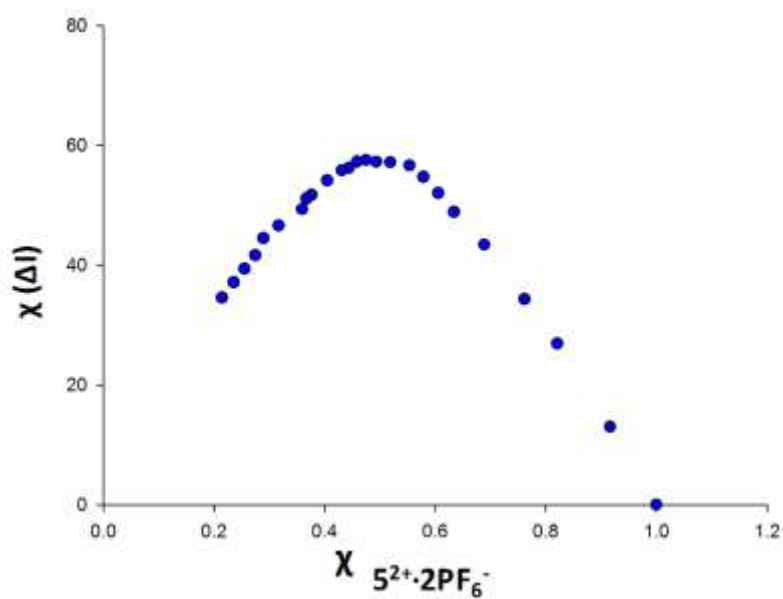

**Figure S8.** Job plot experiment, using the emission titration data, with a maximum at 0.5 indicating 1:1 stoichiometry for receptor  $5^{2+} \cdot 2PF_6^-$  and  $SO_4^{2-}$  anions.

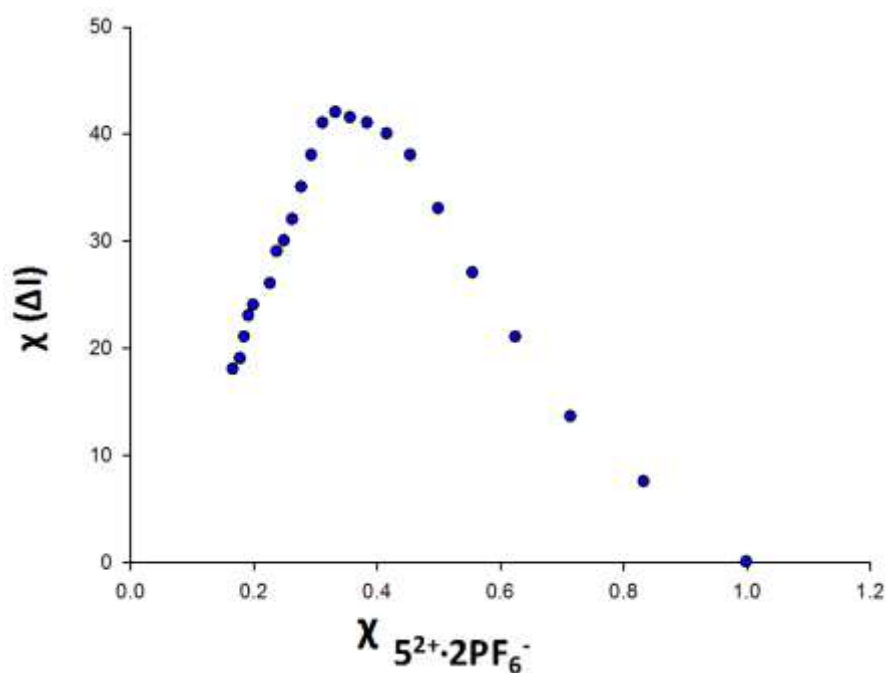

**Figure S9.** Job plot experiment, using the emission titration data, with a maximum at 0.33 indicating 1:2 stoichiometry for receptor  $5^{2+} \cdot 2PF_6^-$  and  $AcO^-$  anions.

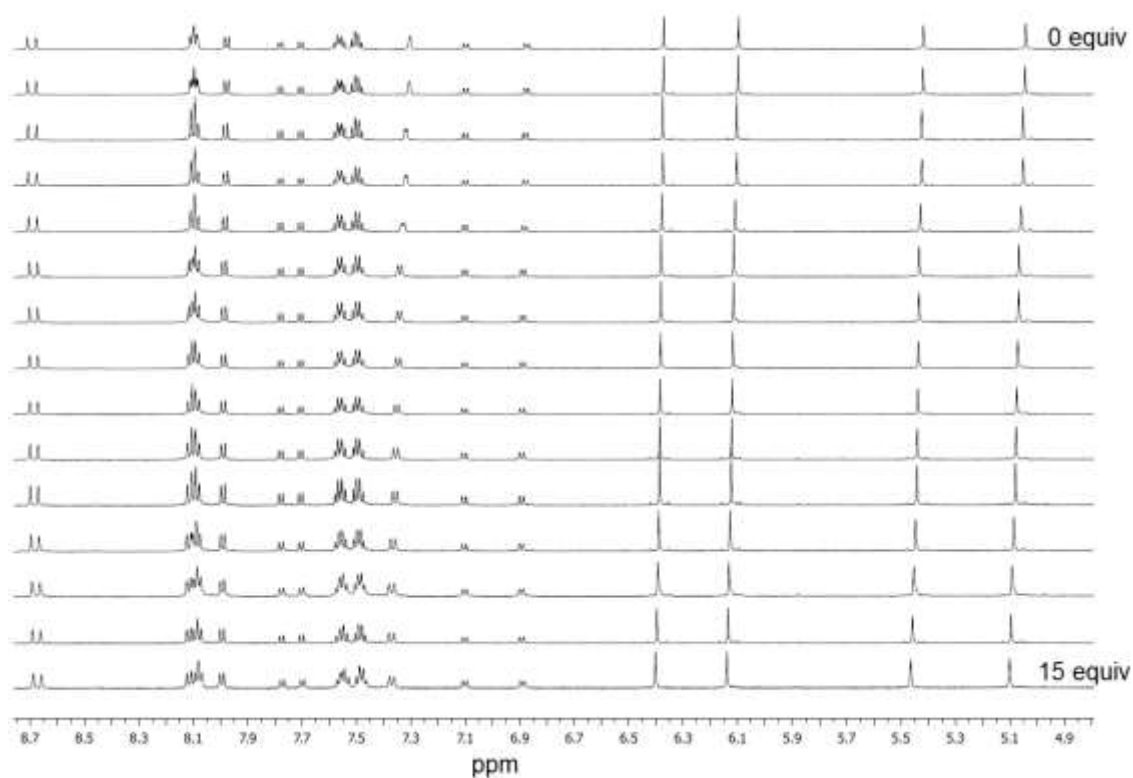

**Figure S10.**  $^1H$  NMR spectral changes observed in the receptor  $5^{2+} \cdot 2PF_6^-$  in  $CD_3CN/CD_3OD$  (8:2, v/v) during the addition of up to 15 equivalents of  $SO_4^{2-}$  ions.

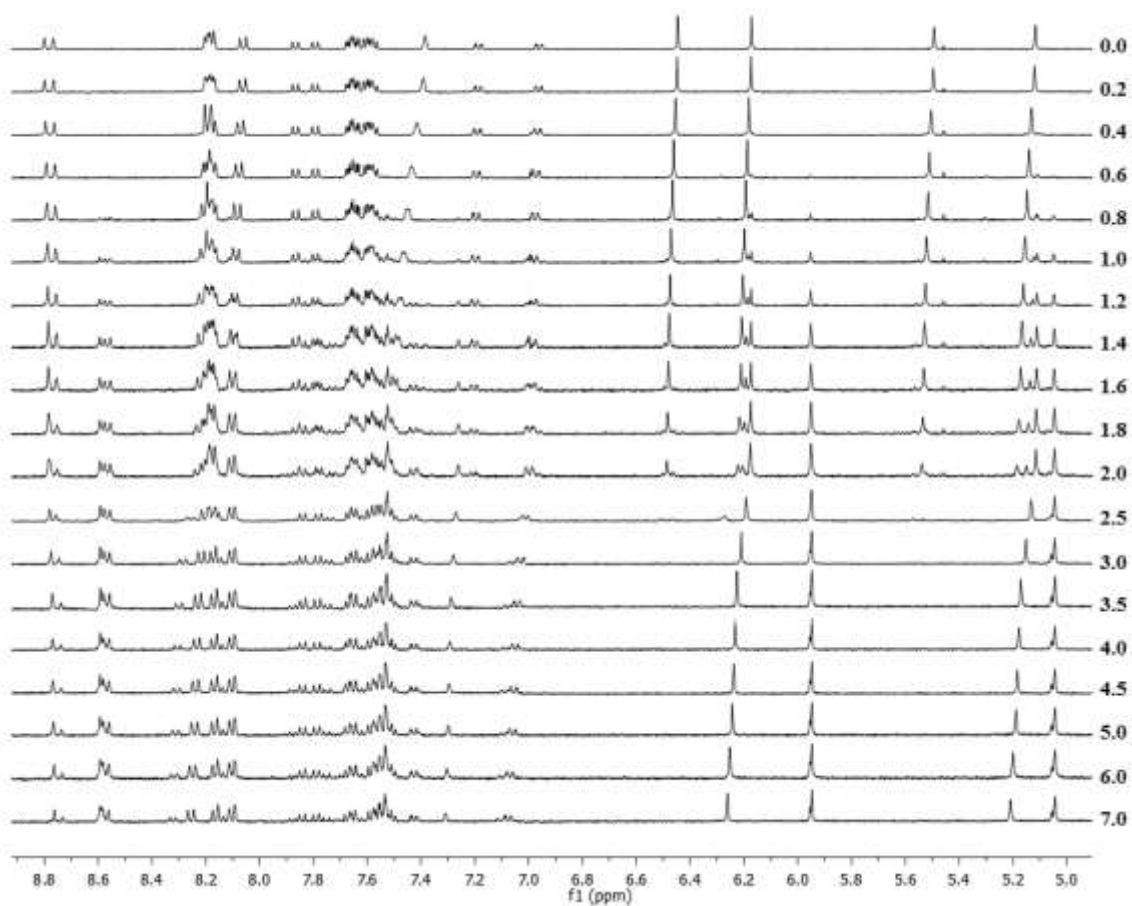

**Figure S11.**  $^1\text{H}$  NMR spectral changes observed in the receptor  $5^{2+} \cdot 2\text{PF}_6^-$  in  $\text{CD}_3\text{CN}/\text{CD}_3\text{OD}$  (8:2, v/v) during the addition of up to 15 equivalents of  $\text{HP}_2\text{O}_7^{3-}$  ions.

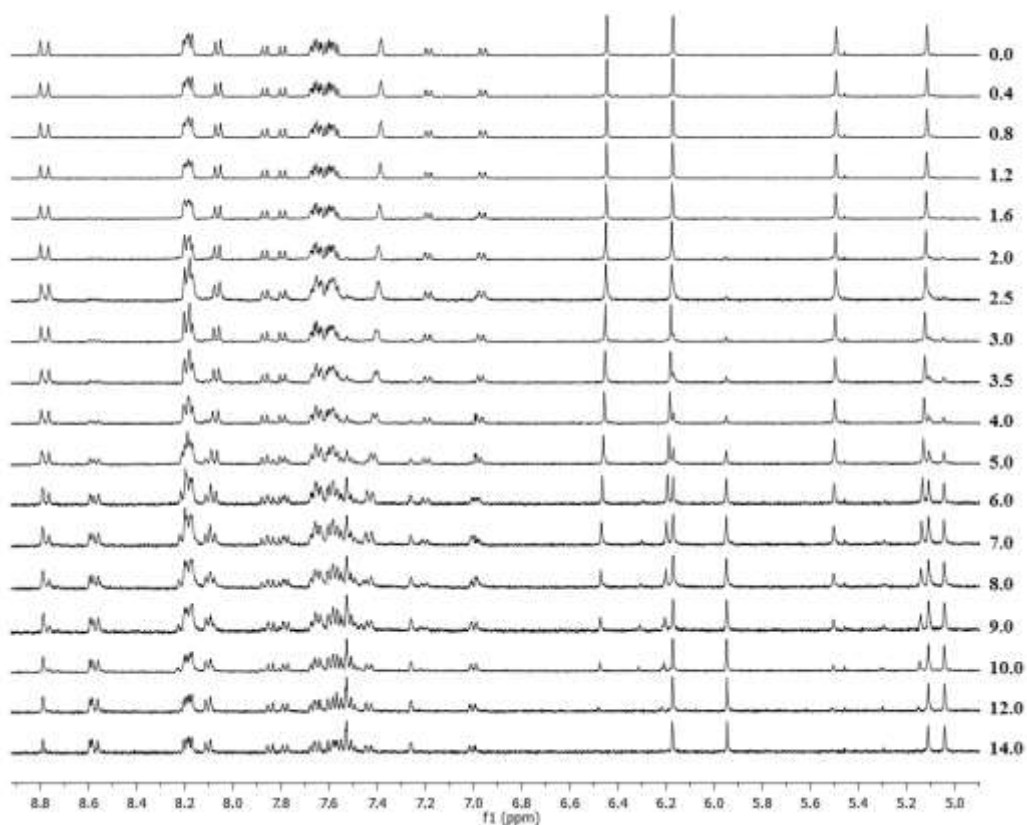

**Figure S12.**  $^1\text{H}$  NMR spectral changes observed in the receptor  $5^{2+}\cdot 2\text{PF}_6^-$  in  $\text{CD}_3\text{CN}/\text{CD}_3\text{OD}$  (8:2, v/v) during the addition of up to 15 equivalents of  $\text{F}^-$  ions.

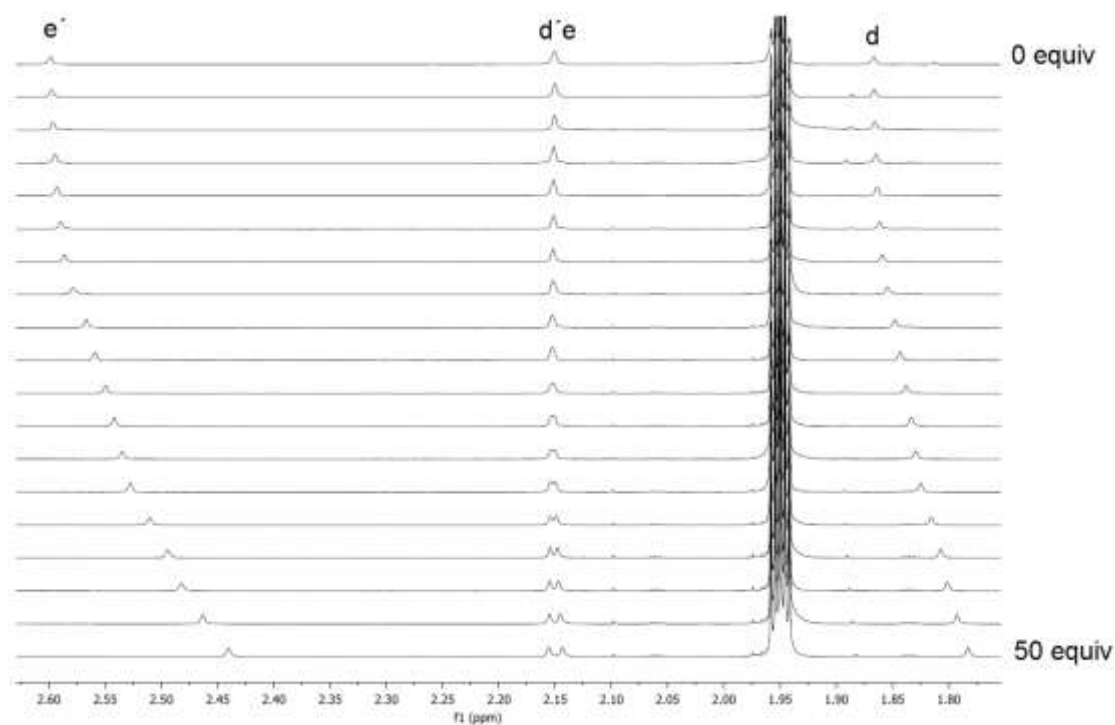

**Figure S13.**  $^1\text{H}$  NMR spectral changes observed in the methyl protons of the receptor  $5^{2+}\cdot 2\text{PF}_6^-$  in  $\text{CD}_3\text{CN}/\text{CD}_3\text{OD}$  (8:2, v/v) during the addition of up to 50 equivalents of  $\text{H}_2\text{PO}_4^-$  ions.

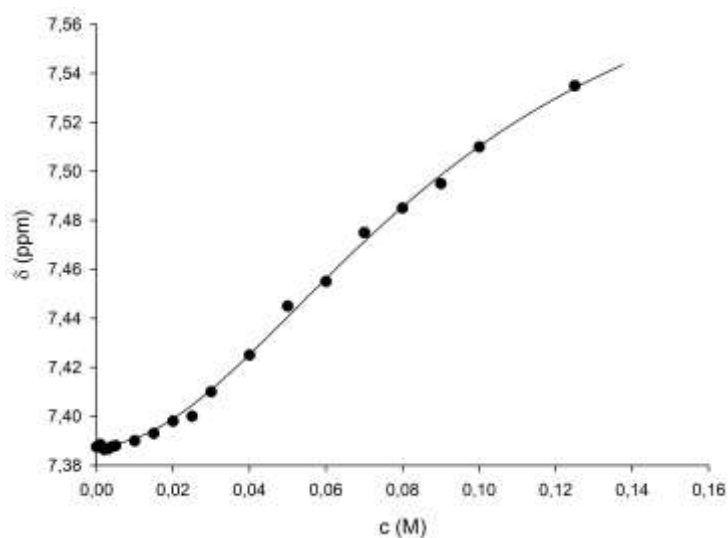

**Figure S14.** Changes in  $^1\text{H}$  NMR spectra in the  $H_a$  proton of the receptor  $5^{2+}\cdot 2\text{PF}_6^-$  upon addition of increasing amounts of  $\text{H}_2\text{PO}_4^-$  anions. Points represent experimental data, continuous lines represent calculate curve.

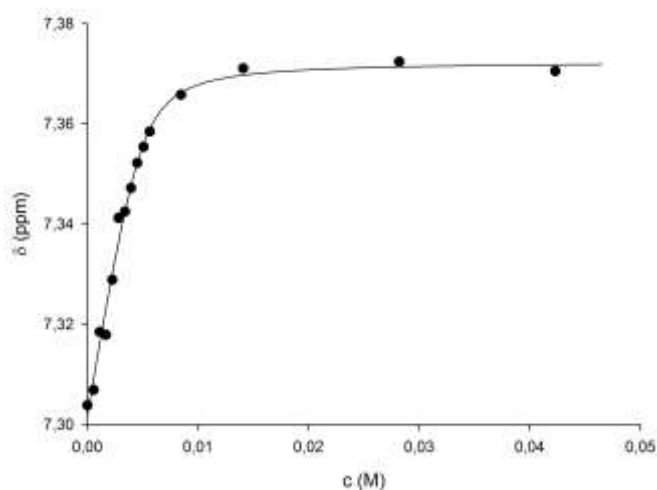

**Figure S15.** Changes in  $^1\text{H}$  NMR spectra in the  $H_a$  proton of the receptor  $5^{2+}\cdot 2\text{PF}_6^-$  upon addition of increasing amounts of  $\text{SO}_4^{2-}$  anions. Points represent experimental data, continuous lines represent calculate curve.

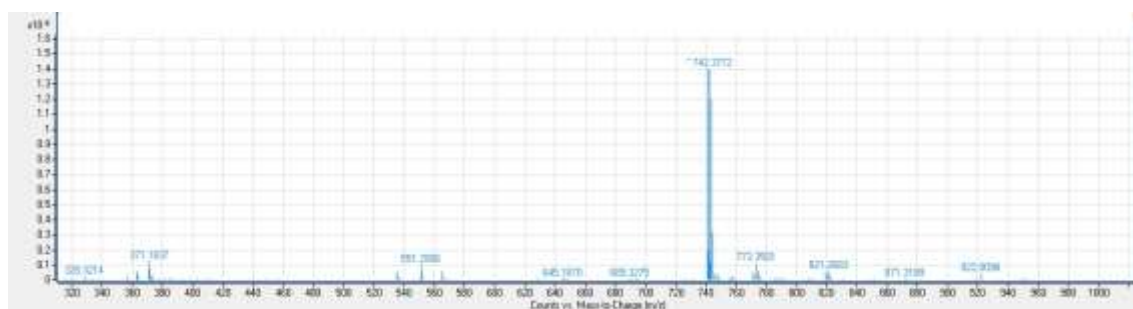

**Figure S16.** Mass spectrum of the solution of  $5^{2+} \cdot 2PF_6^-$  in  $CH_3CN$  after the addition of 3 equivalent of  $HP_2O_7^{3-}$  ions, indicating the formation of the imidazolone  $6^+ \cdot PF_6^-$   $C_{52}H_{45}N_4O^+$  ( $M^+ = 741.36$ )
